# Supplementary material
Source: PubMed Central journal article supplement (PMC1568944)
Supplement: pnas_0602582103_1.pdf [file pnas_0602582103_1.pdf]

ToLC schus4 MKKLTLYLLGLFGLFCLALANEDTPVPEYKYAGRPTGTDVAENPYSVEKQYAKADQIKVDN  
ToLC LVS MKKLTLYLLGLFGLFCLALANEDTPVPEYKYAGRPTGTDVAENPYSVEKQYAKADQIKVDN  
ToLC U112 MKKLTLYLLGLFGLFCLALANEDTPVPEYKYAGRPTGTDVAENPYSVEKQYAKADQIKVDN  
\*\*\*\*\*

ToLC schus4 KFYNLKKADEVAMVGDTEDKYYSLIDIYKLSAEHNADYQAARSTFAANVETVPTALGALL  
ToLC LVS KFYNLKKADEVAMVGDTEDKYYSLIDIYKLSAEHNADYQAARSTFAANVETVPTALGALL  
ToLC U112 KFYNLKKADEVAMVGDTEDKYYSLIDIYKLSAEHNADYQAARSTFAANVETVPTALGALL  
\*\*\*\*\*

ToLC schus4 PQIDFNYNLRRDLYNQFGGRVNDTSNVVNFSGSQVLFDWKWKTYTQATYLQKSYAMIYA  
ToLC LVS PQIDFNYNLRRDLYNQFGGRVNDTSNVVNFSGSQVLFDWKWKTYTQATYLQKSYAMIYA  
ToLC U112 PQIDFNYNLRRDLYNQFGGRVNDTSNVVNFSGSQVLFDWKWKTYTQATYLQKSYAMIYA  
\*\*\*\*\*

ToLC schus4 KAEQTLITDVTAYFELLRAEQALQFQFANEAWNKKLYLTQKYQYNSGMVSYADFKTDDA  
ToLC LVS KAEQTLITDVTAYFELLRAEQALQFQFANEAWNKKLYLTQKYQYNSGMVSYADFKTDDA  
ToLC U112 KAEQTLITDVTAYFELLRAEQALQFQFANEAWNKKLYLTQKYQYNSGMVSYADFKTDDA  
\*\*\*\*\*

ToLC schus4 QYRQAIADRVAQRNFINAKAVMAKLI GKRISSILYISKDTEFGNPVDDINYLNTAEK  
ToLC LVS QYRQAIADRVAQRNFINAKAVMAKLI GKRISSILYISKDTEFGNPVDDINYLNTAEK  
ToLC U112 QYRQAIADRVAQRNFINAKAVMAKLI GKRISSILYISKDTEFGNPVDDINYLNTAEK  
\*\*\*\*\*

ToLC schus4 YNLIDIAQKKFEYEAQEGVGIQWGFPPQANLTGGIMMSRNALSGSPAQIAEIPTKYDVA  
ToLC LVS YNLIDIAQKKFEYEAQEGVGIQWGFPPQANLTGGIMMSRNALSGSPAQIAEIPTKYDVA  
ToLC U112 YNLIDIAQKKFEYEAQEGVGIQWGFPPQANLTGGIMMSRNALSGSPAQIAEIPTKYDVA  
\*\*\*\*\*

ToLC schus4 NIGGQVSWNLLRGGSDY AQLKQASYDNQAANYALLQTKREYVAGTVEAYQTIVLDVVRIE  
ToLC LVS NIGGQVSWNLLRGGSDY AQLKQASYDNQAANYALLQTKREYVAGTVEAYQTIVLDVVRIE  
ToLC U112 NIGGQVSWNLLRGGSDY AQLKQASYDNQAANYALLQTKREYVAGTVEAYQTIVLDVVRIE  
\*\*\*\*\*

ToLC schus4 AFRKSVYSGIASVKAILLEGFEAGTQITVDLLNRQAILVQAQLSFADAI FNYVEDYVSLKQ  
ToLC LVS AFRKSVYSGIASVKAILLEGFEAGTQITVDLLNRQAILVQAQLSFADAI FNYVEDYVSLKQ  
ToLC U112 AFRKSVYSGIASVKAILLEGFEAGTQITVDLLNRQAILVQAQLSFADAI FNYVEDYVSLKQ  
\*\*\*\*\*

ToLC schus4 LQGS LTYKDIEYINTILGTTDIISQIATE  
ToLC LVS LQGS LTYKDIEYINTILGTTDIISQIATE  
ToLC U112 LQGS LTYKDIEYINTILGTTDIISQIATE  
\*\*\*\*\*

FtLC schus4 MKVVRYYLLISLGI FAYCASSIANPVADYTSIKQSINNSPQYKFIGQLNSRQMSPAIQ  
FtLC LVS MKVVRYYLLISLGI FAYCASSIANPVADYTSINQSINNSPQYKFIGQLNSRQMSPAIQ  
FtLC U112 MKVVRYYLLISLGI FAYCASSIANPVADYTSIKQSINNSPQYKFIGQLNSRQMSPAIQ  
\*\*\*\*\*

FtLC schus4 LGRLLPSIDIGGSITATNILDKRTIADGDIAGGRFDSIQGLVTLTQPLYDYGAYKDLQSA  
FtLC LVS LGRLLPSIDIGGSITATNILDKRTIADGDIAGGRFDSIQGLVTLTQPLYDYGAYKDLQSA  
FtLC U112 LGRLLPSIDIGGSITATNILDKRTIADGDIAGGRFDSIQGLVTLTQPLYDYGAYKDLQSA  
\*\*\*\*\*

FtLC schus4 EETAQFAQQDYRTNYQQFLYDVSYAYFNLAKAIKNVQYNSYNLKS NKQSLNELESKFAG  
FtLC LVS EETAQFAQQDYRTNYQQFLYDVSYAYFNLAKAIKNVQYNSYNLKS NKQSLNELESKFAG  
FtLC U112 EETAQFAQQDYRTSYQQFLYDVSYAYFNLAKAIKNVQYNSYNLKS NKQSLNELESKFAG  
\*\*\*\*\*

FtLC schus4 TADVADYETVKANYIIAEADYAAAEREKVARAELRKFTNNDDVLLYNNDFKIKQPSLN  
FtLC LVS TADVADYETVKANYIIAEADYAAAEREKVARAELRKFTNNDDVLLYNNDFKIKQPSLN  
FtLC U112 TADVADYETVKANYIIAEADYAAAEREKVARAELRKFTNNDDVLLYNNDFKIKQPSLN  
\*\*\*\*\*

FtLC schus4 TEEGWHEELTMRSSPSYLGSMHTKESKYYDYQSATSSFMPKVNFEVKYSPGFNDVSSLGNP  
FtLC LVS TEEGWHEELTMRSSPSYLGSMHTKESKYYDYQSATSSFMPKVNFEVKYSPGFNDVSSLGNP  
FtLC U112 TEEGWHEELTMRSSPSYLGSMHTKESKYYDYQSATSSFMPKVNFEVKYSPGFNDVSSLGNP  
\*\*\*\*\*

FtLC schus4 VFDNLSPSKGTINAFYFGINLTWNI FAGVTDYAQLKKAAYDYQSSEFTMIQTGRVAQNDA  
FtLC LVS VFDNLSPSKGTINAFYFGINLTWNI FAGVTDYAQLKKAAYDYQSSEFTMIQTGRVAQNDA  
FtLC U112 VFDNLSPSKGTINAFYFGINLTWNI FAGGTDYAQLKKAAYDYQSSEFTMIQTGRVAQNDA  
\*\*\*\*\*

FtLC schus4 MYAFRFVQLKKKEIESLRKSVAAAKIAYEKYKERYDQGTITITQYFILLNQQYQFLIQLN  
FtLC LVS MYAFRFVQLKKKEIESLRKSVAAAKIAYEKYKERYDQGTITITQYFILLNQQYQFLIQLN  
FtLC U112 MYAFRFVQLKKKEIESLRKSVAAAKIAYEKYKERYDQGTITITQYFILLNQQYQFLIQLN  
\*\*\*\*\*

FtLC schus4 NTEFDYIMGFLSLYKTAGILTAKTVQDFNNWLLLGQDVEL  
FtLC LVS NTEFDYIMGFLSLYKTAGILTAKTVQDFNNWLLLGQDVEL  
FtLC U112 NTEFDYIMGFLSLYKTAGILTAKTVQDFNNWLLLGQDVEL  
\*\*\*\*\*
