# Supplementary material
Source: PubMed Central journal article supplement (PMC1568944)

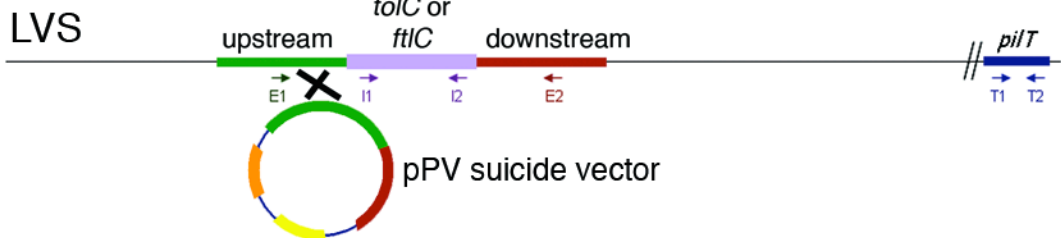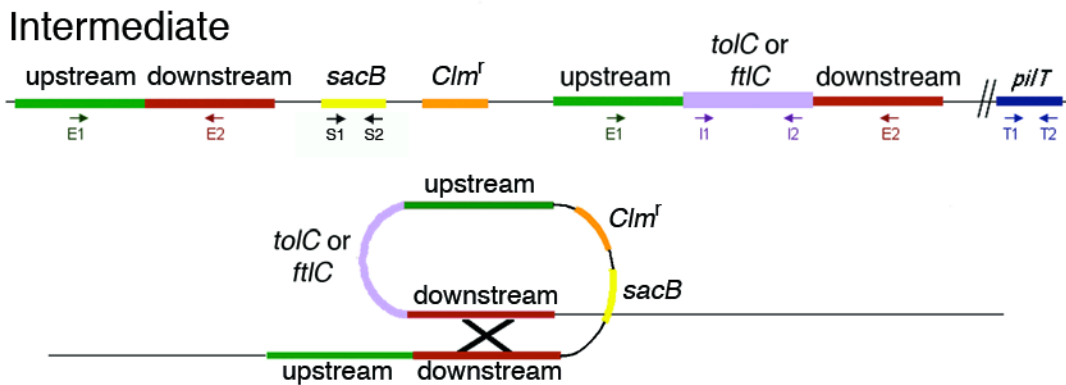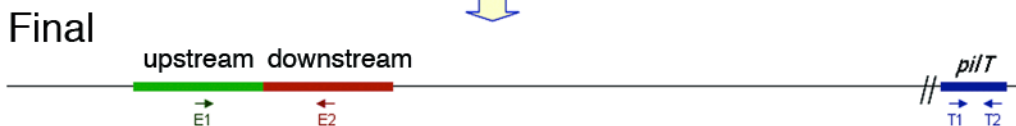

Supplement: pnas_0602582103_2.pdf [file pnas_0602582103_2.pdf]

int.

DTH1

LVS

int.

DTB3

LVS

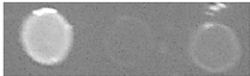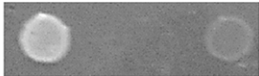

clm

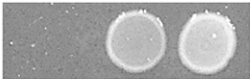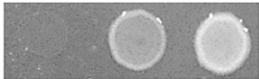

sucrose

Supplement: pnas_0602582103_3.pdf [file pnas_0602582103_3.pdf]

2 h

24 h

LVS

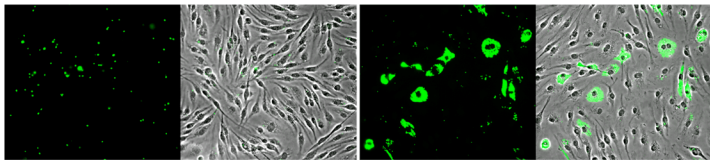

DTH1

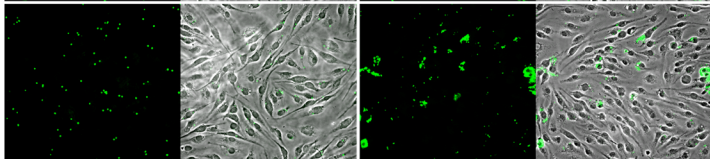

DTB3

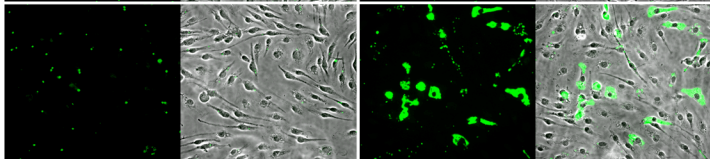

Supplement: pnas_0602582103_4.pdf [file pnas_0602582103_4.pdf]
